# Supplementary material
Source: MDPI journal article supplement (https://www.mdpi.com/2227-9040/11/2/104)
Supplement: s1 [file s1]

# New insights on the Raman and SERS spectra of luteolin under different excitation conditions: experiments and DFT calculations

Marilena Ricci <sup>1</sup>, Emilio Mario Castellucci <sup>2</sup>, Silvia Innocenti <sup>3</sup> and Maurizio Becucci <sup>1,2,\*</sup>

<sup>1</sup> Department of Chemistry 'Ugo Schiff', University of Florence, via della Lastruccia 3-13, 50019 Sesto Fiorentino (FI), Italy

<sup>2</sup> European Laboratory for Non Linear Spectroscopy (LENS), University of Florence, via N. Carrara 1, 50019 Sesto Fiorentino (FI), Italy

<sup>3</sup> CNR-INO National Research Council, National Institute of Optics, Largo E. Fermi 6, 50125 Florence, Italy

\* Correspondence: maurizio.becucci@unifi.it; Tel.: +39-0554573089

## Supplementary Information

**Table S1.** Raman spectrum of luteolin, sample 1 (from Sigma Aldrich): experimental data and proposed assignment based on DFT calculations on the hydrogen bonded conformer (Fig. 2, left panel). Intensity in arbitrary units. The normal mode description expressed as redundant internal coordinates (larger contributions) is provided. The internal coordinates are labeled as follows: first a letter to indicate the nature of the vibration (**s** for stretching, **b** for in plane bending or deformation, **d** for out of plane bending or deformation), then the indication of the atoms and the ring involved (e.g. s CC A indicates a C-C stretching vibration on luteolin ring A).

| Calculated |                                                                        |            |           | Experimental |           |
|------------|------------------------------------------------------------------------|------------|-----------|--------------|-----------|
| nr.        | description                                                            | wavenumber | intensity | wavenumber   | intensity |
| 77         | s CC A<br>b COH A<br>s CC A<br>s CC AC<br>s CC C<br>b CCH C<br>s C=O C | 1649       | 0.39      | 1658         | 0.22      |
| 75         | s CC B<br>s C=O B<br>s CC A                                            | 1603       | 1.00      | 1613         | 0.97      |
| 74         | s CC B<br>b CCH B                                                      | 1596       | 0.45      | 1599         | 0.97      |
| 72         | s CC B<br>s CC BC<br>b CCH C<br>s CC A                                 | 1568       | 0.83      | 1578         | 0.48      |
|            |                                                                        |            |           | 1570         | 0.50      |
| 71         | b CCH B                                                                | 1521       | 0.03      | 1538         | 0.09      |
| 70         | b COH A<br>b CCH A<br>s CC A                                           | 1494       | 0.15      | 1504         | 0.19      |
| 69         | b CCH A<br>s CC A<br>s C=O C                                           | 1450       | 0.06      | 1457         | 0.23      |
| 6          | s CC AC<br>s CC A<br>b CCH A<br>b COH A                                | 1382       | 0.16      | 1378         | 0.29      |
| 65         | b COH B<br>s CC B<br>b CCH C                                           | 1356       | 0.17      |              |           |
| 62         | s CO B<br>s CC BC<br>s CC B<br>b COH B<br>b CCH B<br>s C-O C           | 1303       | 0.35      | 1315         | 0.24      |
|            |                                                                        |            |           | 1298         | 0.92      |
| 60         | s CO B<br>b CCH B<br>b CCH C                                           | 1269       | 0.06      | 1267         | 1.00      |

|    |                                         |      |      |      |      |
|----|-----------------------------------------|------|------|------|------|
| 59 | b CCH C<br>s C-O C<br>s CC C            | 1251 | 0.1  |      |      |
| 57 | b CCH B<br>b CCH C<br>s CC BC           | 1195 | 0.34 | 1219 | 0.70 |
| 55 | b CCH B<br>b COH B                      | 1160 | 0.02 | 1190 | 0.05 |
| 54 | b COH B<br>s CC B                       | 1154 | 0.02 |      |      |
| 52 | b COH B<br>b CCH C<br>b CCH B<br>s CC C | 1105 | 0.04 | 1130 | 0.12 |

**Table S2.** Raman spectrum of luteolin, sample 2 (from Selleck): experimental data and the proposed assignment based on DFT calculations (geometry shown in Fig. 2, right panel). Intensity in arbitrary units. The normal mode description expressed as redundant internal coordinates (larger contributions) is provided. The internal coordinates are labeled as follows: first a letter to indicate the nature of the vibration (**s** for stretching, **b** for in plane bending or deformation, **d** for out of plane bending or deformation), then the indication of the atoms and the ring involved (e.g. s CC A indicates a C-C stretching vibration on luteolin ring A).

| Calculated |                                                             |            |           | Experimental |           |
|------------|-------------------------------------------------------------|------------|-----------|--------------|-----------|
| nr.        | description                                                 | wavenumber | intensity | wavenumber   | intensity |
| 77         | s C=O C<br>b CCC C<br>b CCH C<br>s CC C                     | 1663       | 0.33      | 1665         | 0.17      |
| 76         | s CC C<br>s CC A<br>s CC A<br>b CCH C                       | 1627       | 0.33      | 1610         | 0.37      |
| 74         | s CC B<br>b CCH B                                           | 1606       | 1.0       | 1589         | 1.0       |
| 72         | s CC A<br>b CCH A<br>s CC C<br>s CC AC<br>b COH A<br>s CC A | 1577       | 0.29      |              |           |
| 71         | b CCH B                                                     | 1520       | 0.03      | 1506         | 0.11      |
| 70         | b CCH A<br>s CC A<br>b COH A                                | 1491       | 0.02      | 1492         | 0.03      |
| 69         | b CCH A<br>s CC A                                           | 1437       | 0.03      | 1447         | 0.24      |
| 67         | s C-O C<br>s CC AC<br>s C-O A<br>s CC C                     | 1367       | 0.13      | 1365         | 0.08      |
| 64         | b CCH B<br>b COH B<br>b CCH C<br>s C-O C                    | 1326       | 0.07      | 1327         | 0.05      |
| 63         | b COH B<br>b CCH C<br>b CCH B<br>s C-O B<br>s CC B          | 1305       | 0.13      | 1303         | 0.24      |

|    |                                          |      |      |      |      |
|----|------------------------------------------|------|------|------|------|
| 62 | b CCH B<br>s C-O B<br>b COH B            | 1291 | 0.10 |      |      |
| 61 | s C-O B<br>b CCH B                       | 1266 | 0.04 | 1261 | 0.25 |
| 60 | b CCH C<br>b CCH A<br>b CCH A            | 1253 | 0.07 |      |      |
| 58 | b COH A<br>b CCH B<br>b CCH C<br>b CCH C | 1193 | 0.15 | 1223 | 0.46 |

**Table S3.** SERS spectrum of luteolin: experimental data and the proposed assignment based on DFT calculations for the CPLX1 conformer. The experimental bands at  $\sim 1650$  and  $1615\text{ cm}^{-1}$  (bold character) do not find a corresponding transition in the calculated spectrum for CPLX1 but are among the most strong features calculated for CPLX2, see Table SI4). Intensity in arbitrary units. The normal mode description in terms of redundant internal coordinates (larger contributions) is provided. The internal coordinates are labeled as follows: first a letter to indicate the nature of the vibration (**s** for stretching, **b** for in plane bending or deformation, **d** for out of plane bending or deformation), then the indication of the atoms and the ring involved (e.g. s CC A indicates a C-C stretching vibration on luteolin ring A).

| CPLX1, luteolin-Ag <sub>14</sub> |                                                   |            |           |                  |                  |
|----------------------------------|---------------------------------------------------|------------|-----------|------------------|------------------|
| Calculated                       |                                                   |            |           | Experimental     |                  |
| nr. <sup>1</sup>                 | description                                       | wavenumber | intensity | 514 nm           | 785nm            |
| 83                               | s CC A<br>b CCH A                                 | 1625       | 0.00      | <b>1652/0.13</b> | <b>1649/0.10</b> |
| 82                               | s CC B<br>b CCH B                                 | 1618       | 0.03      | <b>1615/0.27</b> | <b>1612/0.18</b> |
| 81                               | s CC C<br>s CC B<br>b CCH B<br>s CC BC            | 1589       | 0.88      | 1576/0.65        | 1578/0.41        |
| 80                               | b CCH B<br>s CC B                                 | 1584       | 0.22      | 1568/0.35        | 1569/0.45        |
| 79                               | s CC A<br>b CCH A<br>s CC C<br>s CC AC            | 1553       | 0.17      | 1546/0.30        |                  |
| 77                               | b CCH A<br>s C=O C<br>b COH A                     | 1509       | 1.00      | 1509/0.5         | 1502/0.30        |
| 76                               | s C=O C<br>s CC C<br>s CC A<br>b COH A<br>b CCH A | 1488       | 0.60      | 1446/0.45        | 1446/0.10        |
| 74                               | b CCH A<br>s CC A                                 | 1416       | 0.14      | 1394/0.35        |                  |
| 73                               | b COH B<br>s CC B                                 | 1361       | 0.07      | 1363/0.40        | 1357/0.10        |
| 72                               | b COH B<br>b CCH B                                | 1353       | 0.18      |                  |                  |
| 69                               | s C-C BC<br>b COH B<br>s C-O C<br>s CC B          | 1306       | 0.43      | 1308/0.35        | 1308/0.15        |
| 67                               | s C-O B<br>b CCH B                                | 1289       | 0.11      | 1296/0.15        | 1296/0.15        |

|    |                    |      |      |           |           |
|----|--------------------|------|------|-----------|-----------|
| 66 | b CCH C            | 1272 | 0.19 |           | 1253/0.10 |
| 65 | b CCH A<br>b CCH B | 1224 | 0.24 | 1220/0.55 | 1219/0.30 |
| 64 | b CCH B            | 1209 | 0.11 |           |           |
| 61 | b COH A            | 1171 | 0.18 |           |           |

<sup>1</sup> Please note that the numbering of calculated normal modes for the complex is increased with respect to the corresponding ones of the isolated luteolin due to the six low frequency intermolecular vibrational modes (hindered displacement of the Ag<sub>14</sub> cluster with respect to the luteolin molecular frame).

**Table S4.** SERS spectrum of luteolin: experimental data and the proposed assignment based on DFT calculations for the CPLX2 conformer. Intensity in arbitrary units. The normal mode description in terms of redundant internal coordinates (larger contributions) is provided. The internal coordinates are labeled as follows: first a letter to indicate the nature of the vibration (**s** for stretching, **b** for in plane bending or deformation, **d** for out of plane bending or deformation), then the indication of the atoms and the involved (e.g. s CC A indicates a C-C stretching vibration on luteolin ring A).

| CPLX2, luteolin-Ag <sub>14</sub> |                                                     |            |           |
|----------------------------------|-----------------------------------------------------|------------|-----------|
| Calculated                       |                                                     |            |           |
| nr. <sup>1</sup>                 | description                                         | wavenumber | intensity |
| 83                               | s CC C<br>b CCH C<br>s CC BC<br>b OCC BC<br>s C=O C | 1649       | 1.00      |
| 81                               | s CC B<br>b CCH B                                   | 1625       | 0.56      |
| 80                               | s C=O C<br>s CC A<br>s CC B<br>b CCH B              | 1610       | 0.26      |
| 78                               | s CC A<br>s C=O C<br>b COH A<br>b CCH A             | 1586       | 0.13      |
| 77                               | b CCH B<br>b CCH B<br>b CCH B<br>b CCH B<br>s CC B  | 1527       | 0.07      |
| 70                               | b CCH B                                             | 1337       | 0.12      |
| 69                               | b CCH B<br>b COH B                                  | 1311       | 0.07      |
| 68                               | s C-O B<br>s CC C<br>b COH A<br>b CCH B             | 1290       | 0.12      |
| 67                               | b CCH C<br>s CC C<br>b CCH A<br>s C-O C             | 1279       | 0.12      |
| 64                               | b CCC A<br>b COH A<br>b COH B<br>b CCH B            | 1196       | 0.08      |
| <i>continue...</i>               |                                                     |            |           |



|    |                                                     |      |      |
|----|-----------------------------------------------------|------|------|
| 63 | b COH A<br>b COH B<br>s C-O C<br>b CCH B<br>b CCH A | 1191 | 0.06 |
|----|-----------------------------------------------------|------|------|

<sup>1</sup> Please note that the numbering of calculated normal modes for the complex is increased with respect to the corresponding ones of the isolated luteolin due to the six low frequency intermolecular vibrational modes (hindered displacement of the Ag<sub>14</sub> cluster with respect to the luteolin molecular frame).

**Table S5.** Relevant charge transfer transitions in the near IR- visible spectrum of the luteolin-Ag<sub>14</sub> CPLX1.

| nr. | wavelength / nm | oscillator strength / $f$ |
|-----|-----------------|---------------------------|
| 5   | 1394            | 0.12                      |
| 6   | 1258            | 0.02                      |
| 17  | 549             | 0.01                      |
| 18  | 536             | 0.01                      |
| 26  | 437             | 0.03                      |
| 33  | 407             | 0.02                      |

**Table S6.** Relevant charge transfer transitions in the near IR- visible spectrum of the luteolin-Ag<sub>14</sub> CPLX2.

| nr. | wavelength / nm | oscillator strength $f$ |
|-----|-----------------|-------------------------|
| 8   | 819             | 0.003                   |
| 12  | 601             | 0.001                   |
| 22  | 443             | 0.001                   |
| 28  | 414             | 0.001                   |
| 31  | 400             | 0.008                   |

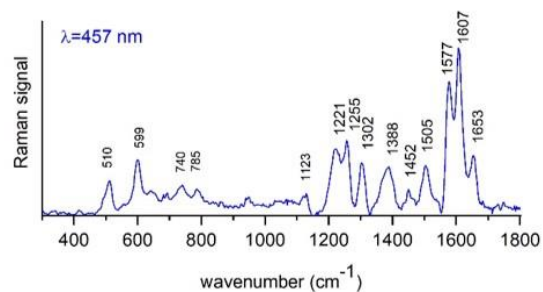

**Figure S1.** Raman spectrum of luteolin in ethanol (457 nm excitation), as obtained either from Sigma-Aldrich or Selleck suppliers.

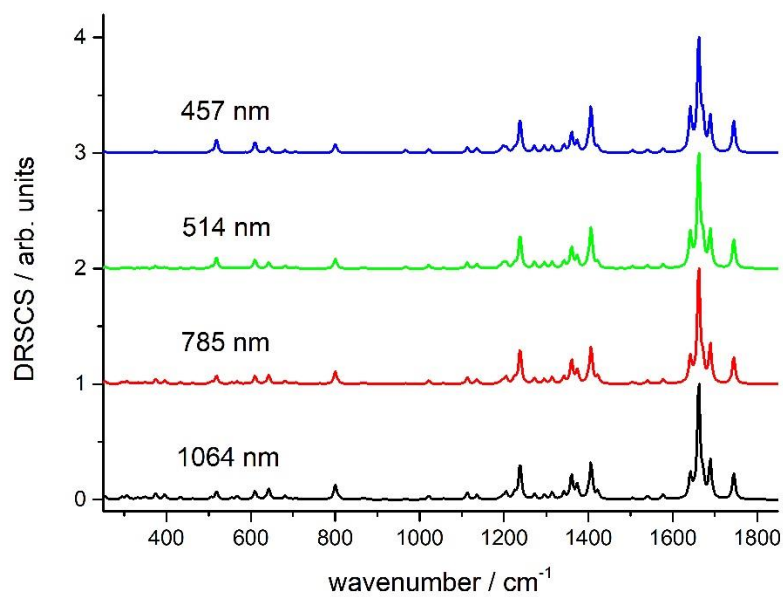

**Figure S2.** Pre-resonance Raman spectra (DRSCS, frequency unscaled) of luteolin calculated for relevant excitation wavelengths.

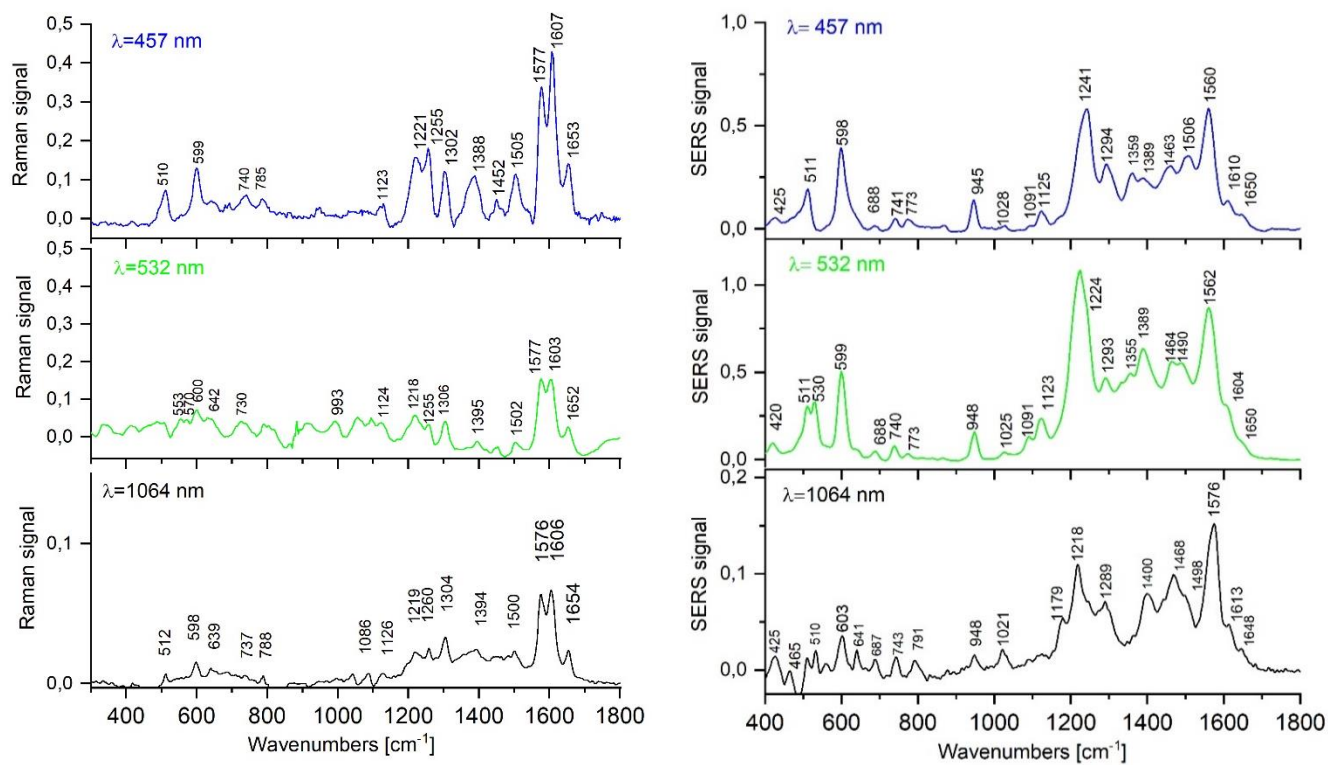

**Figure S3.** Raman and SERS spectrum of luteolin in solution at different excitation wavelengths
